# Supplementary material for: Evaluation of the Chemical Profile and Antioxidant Capacity of Green, Brown, and Dark Propolis
Source: MDPI journal article supplement (doi:10.3390/plants12183204), 2023-09-08

## Supplementary file

**Figure S1.** PS(+)MS of the aqueous extract of the dark propolis.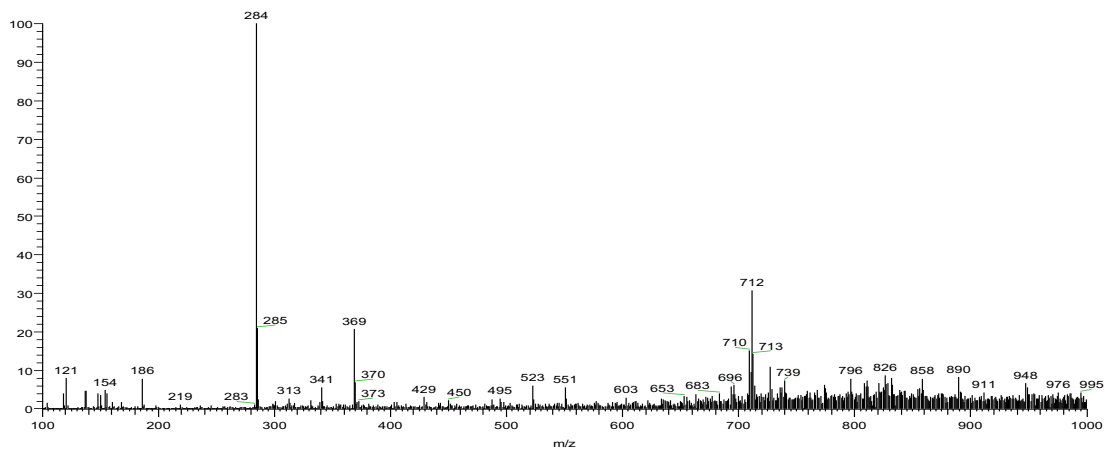**Figure S2.** PS(+)MS of the aqueous extract of the green propolis.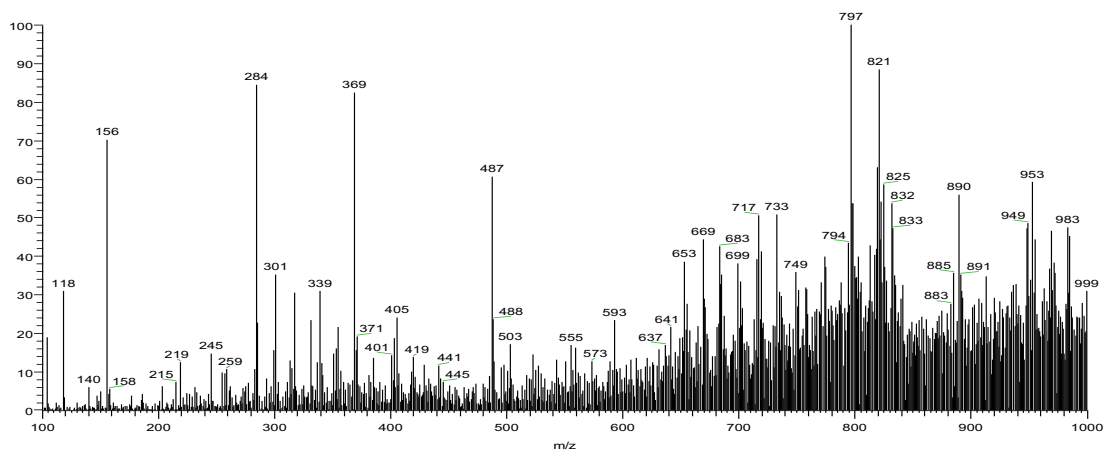**Figure S3.** PS(+)MS of the aqueous extract of the brown propolis.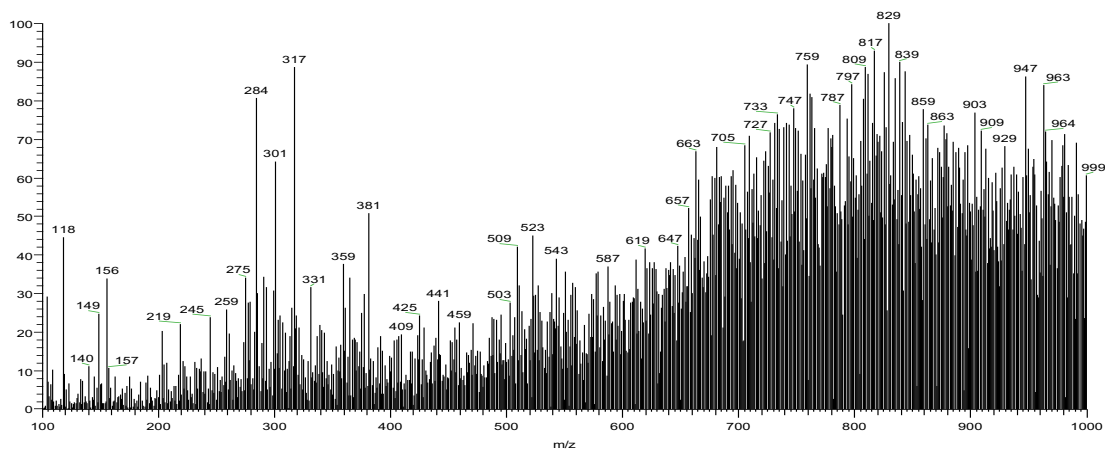

**Figure S4.** PS(-)MS of the aqueous extract of the dark propolis.

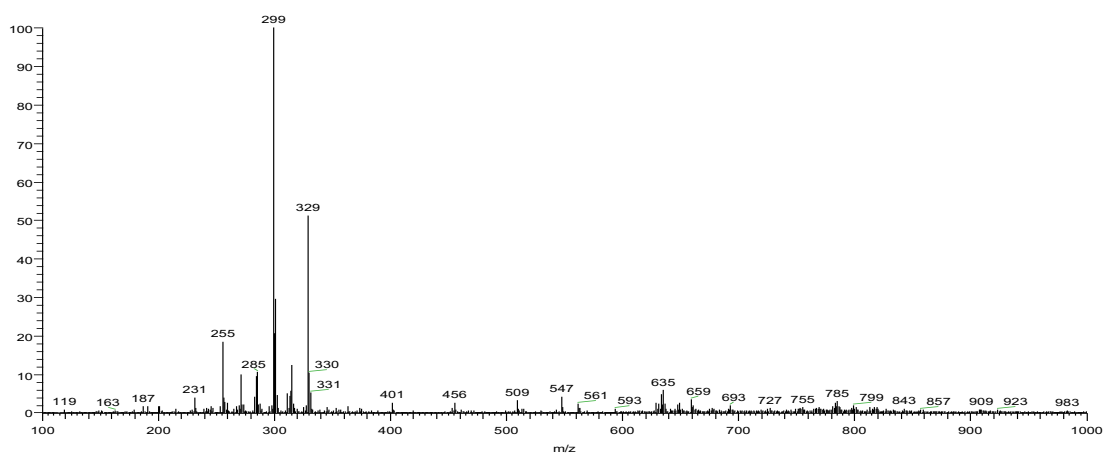

**Figure S5.** PS(-)MS of the aqueous extract of the green propolis.

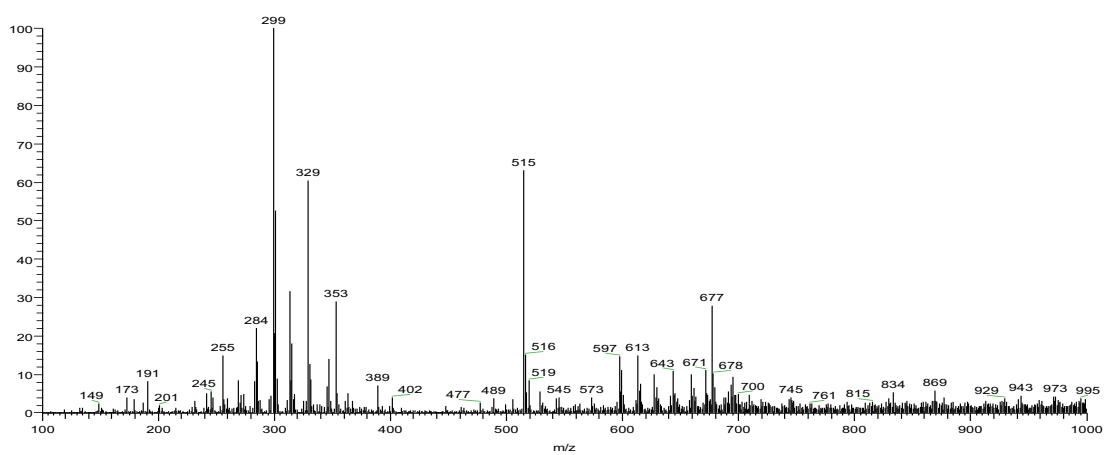

**Figure S6.** PS(-)MS of the aqueous extract of the brown propolis.

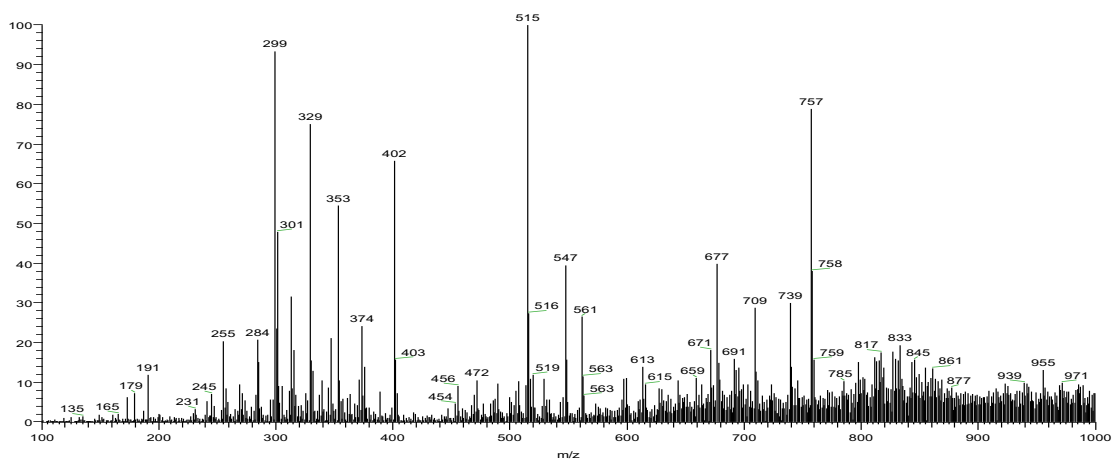

**Figure S7.** Product ion mass spectrum (MS/MS) of the ion of  $m/z$  301 (ascribed as protonated Artepillin C).

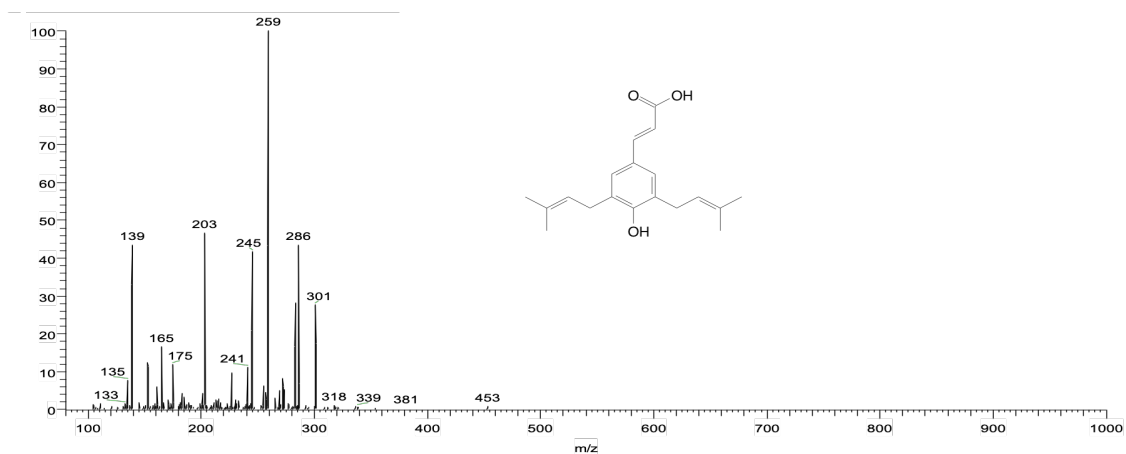

**Figure S8.** Product ion mass spectrum (MS/MS) of the ion of  $m/z$  317 (ascribed as protonated 7-hydroxy dehydroabietic acid).

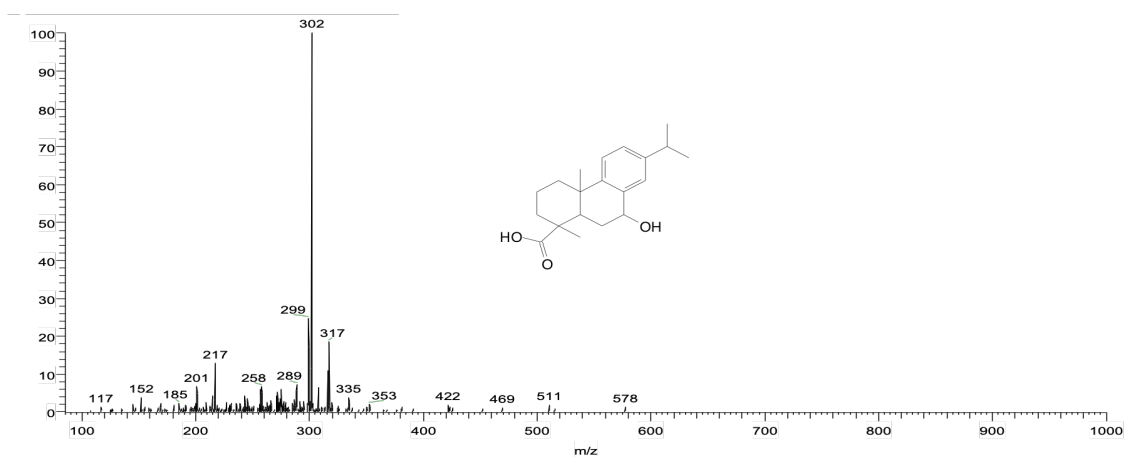

**Figure S9.** Product ion mass spectrum (MS/MS) of the ion of  $m/z$  340 (ascribed as protonated Lobelanidin).

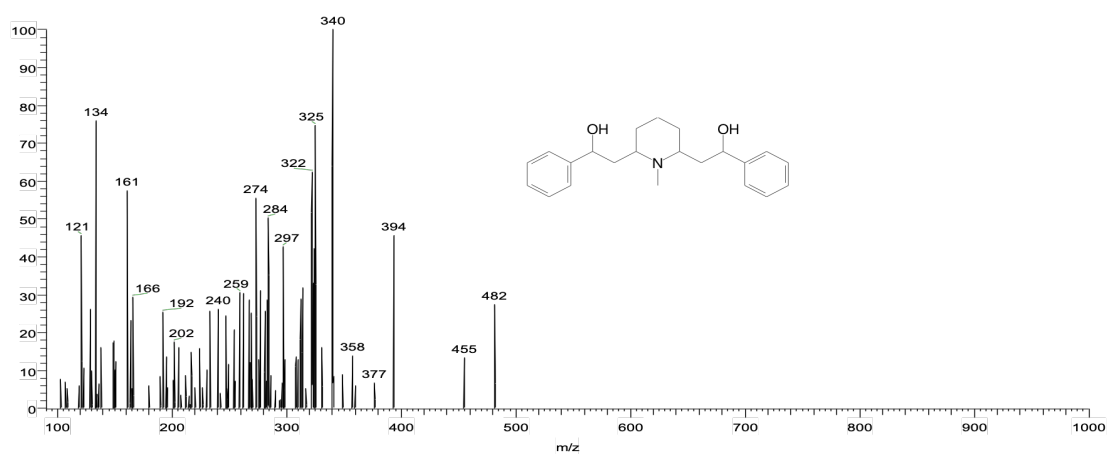

**Figure S10.** Product ion mass spectrum (MS/MS) of the ion of  $m/z$  163 (ascribed as deprotonated Coumaric *p*-acid).

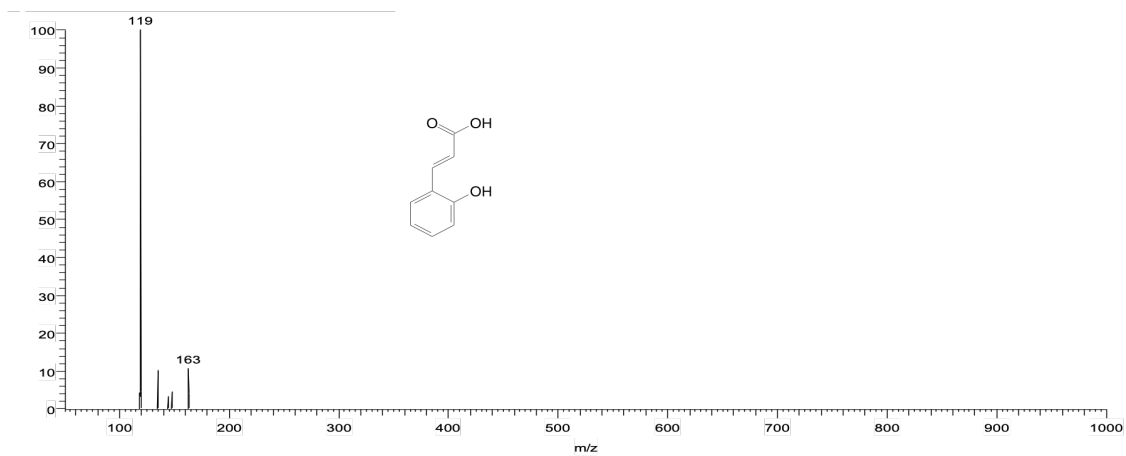

**Figure S11.** Product ion mass spectrum (MS/MS) of the ion of  $m/z$  179 (ascribed as deprotonated Caffeic acid).

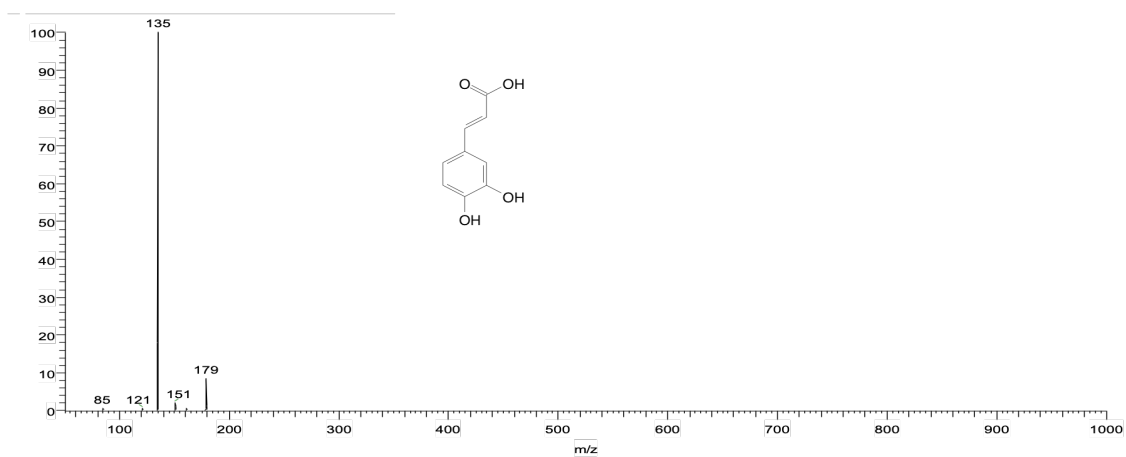

**Figure S12.** Product ion mass spectrum (MS/MS) of the ion of  $m/z$  231 (ascribed as deprotonated Drupanin).

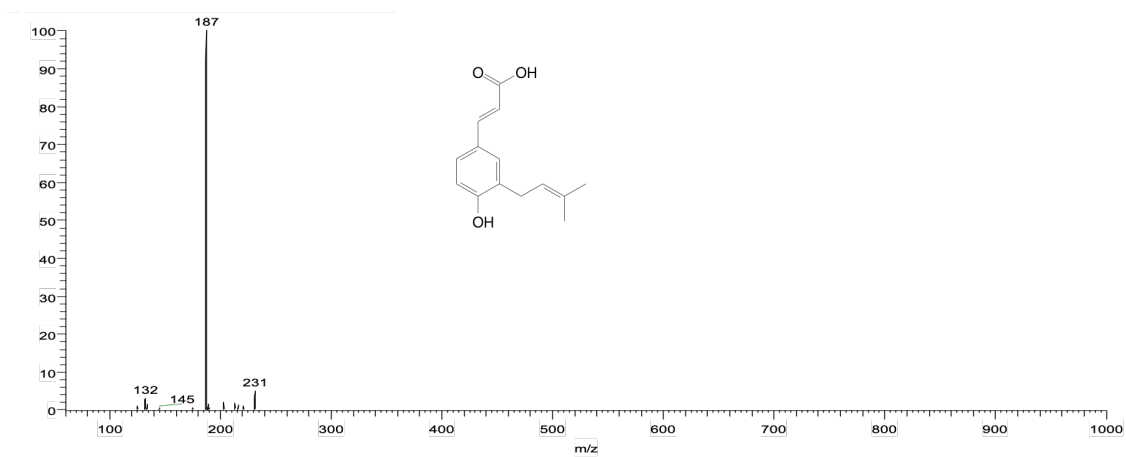

**Figure S13.** Product ion mass spectrum (MS/MS) of the ion of  $m/z$  253 (ascribed as deprotonated Chrysin).

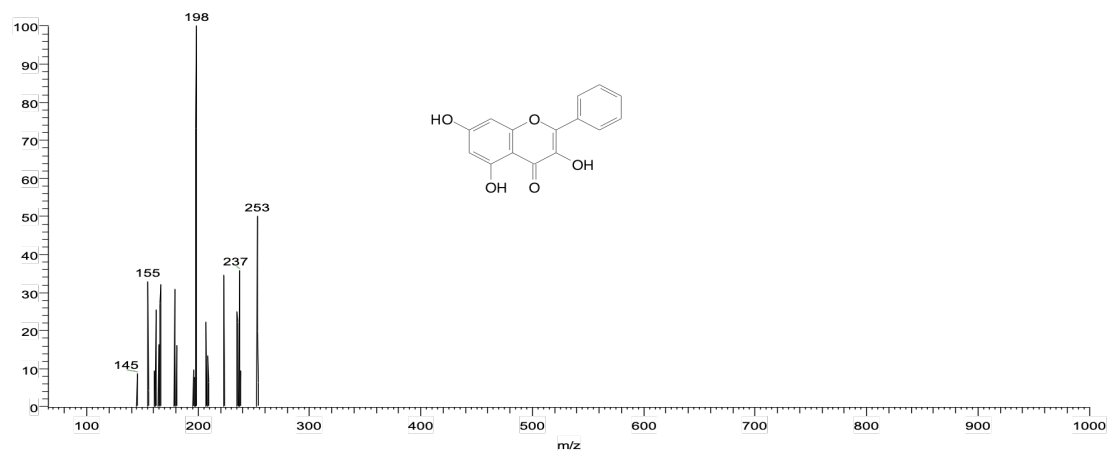

**Figure S14.** Product ion mass spectrum (MS/MS) of the ion of  $m/z$  255 (ascribed as deprotonated Pinocembrin).

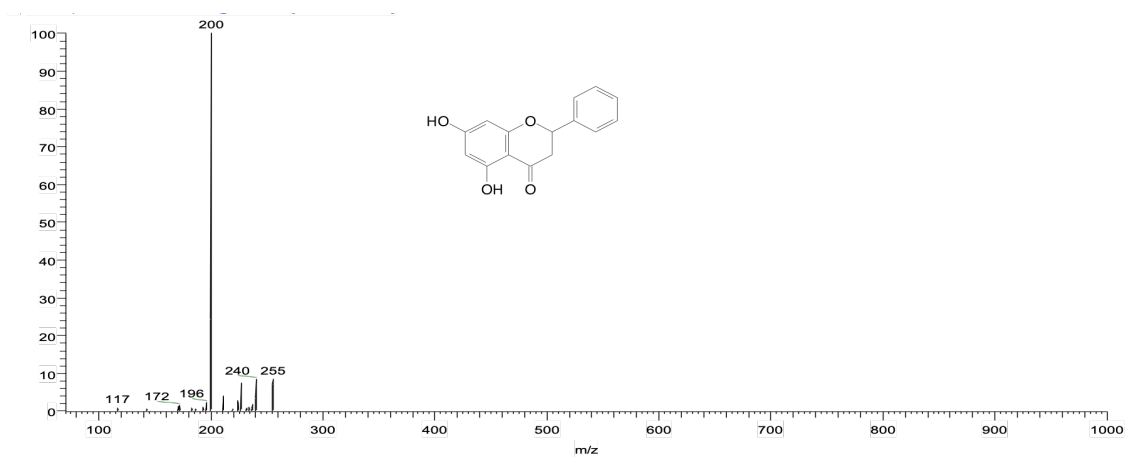

**Figure S15.** Product ion mass spectrum (MS/MS) of the ion of  $m/z$  267 (ascribed as deprotonated Apigenin).

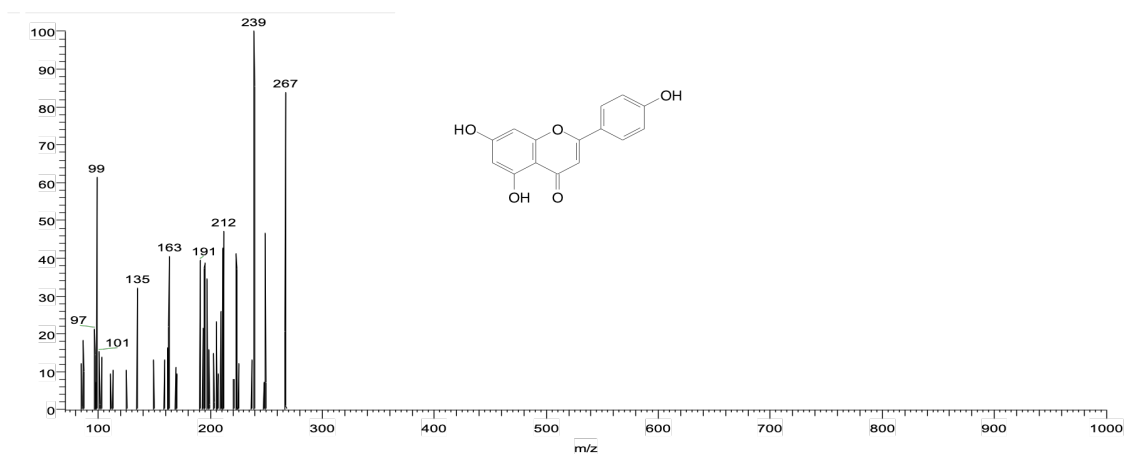

**Figure S16.** Product ion mass spectrum (MS/MS) of the ion of  $m/z$  269 (ascribed as deprotonated Caffeic Acid Benzyl Ester).

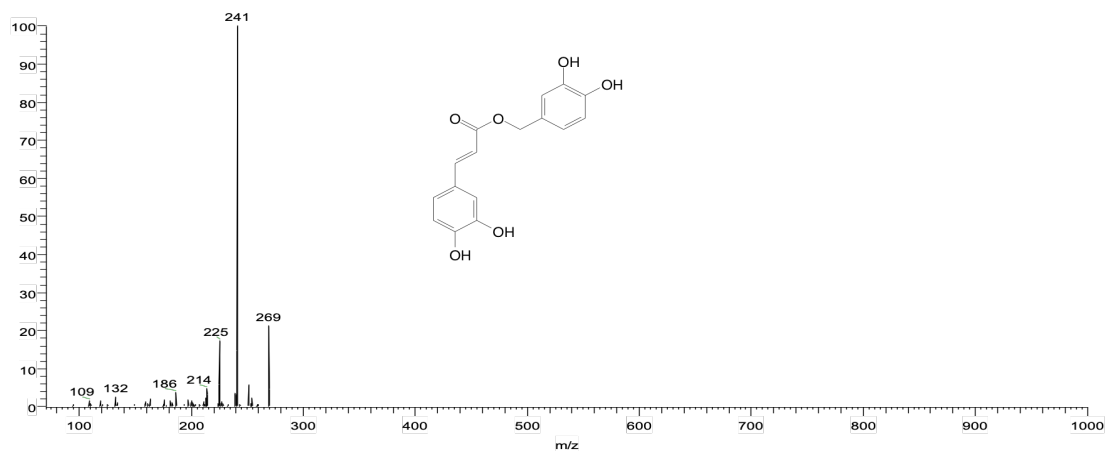

**Figure S17.** Product ion mass spectrum (MS/MS) of the ion of  $m/z$  271 (ascribed as deprotonated Naringenin).

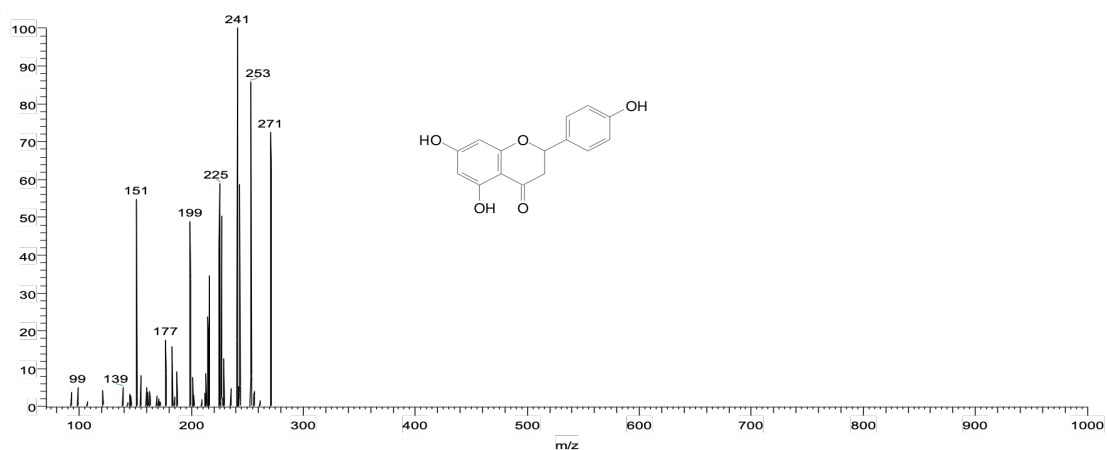

**Figure S18.** Product ion mass spectrum (MS/MS) of the ion of  $m/z$  283 (ascribed as deprotonated Galangin-5-methyl-ether).

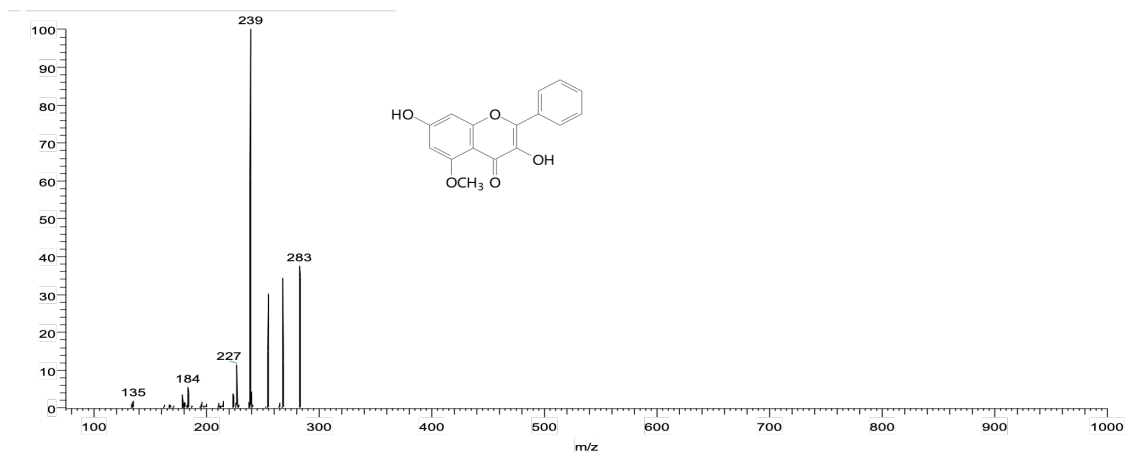

**Figure S19.** Product ion mass spectrum (MS/MS) of the ion of  $m/z$  289 (ascribed as deprotonated Epicatechin).

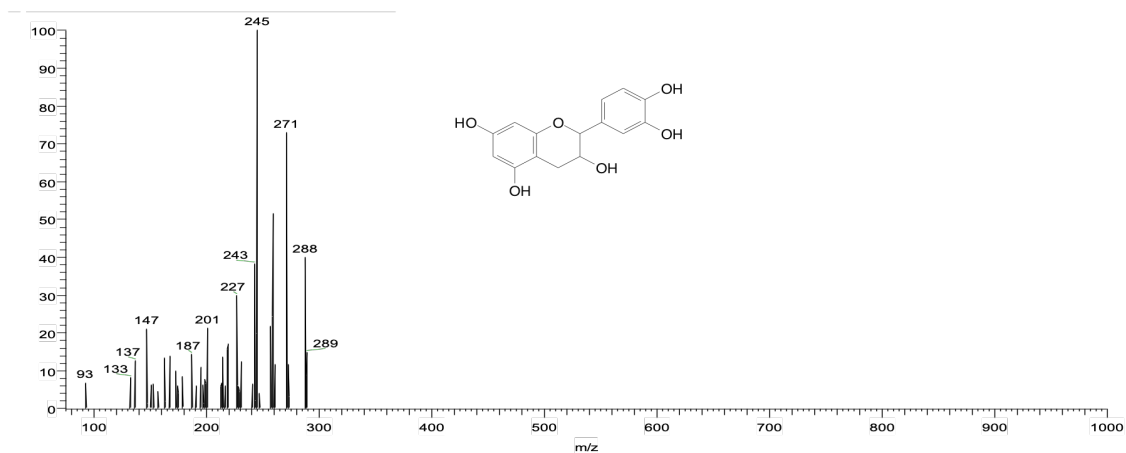

**Figure S20.** Product ion mass spectrum (MS/MS) of the ion of  $m/z$  295 (ascribed as deprotonated Kaempferide).

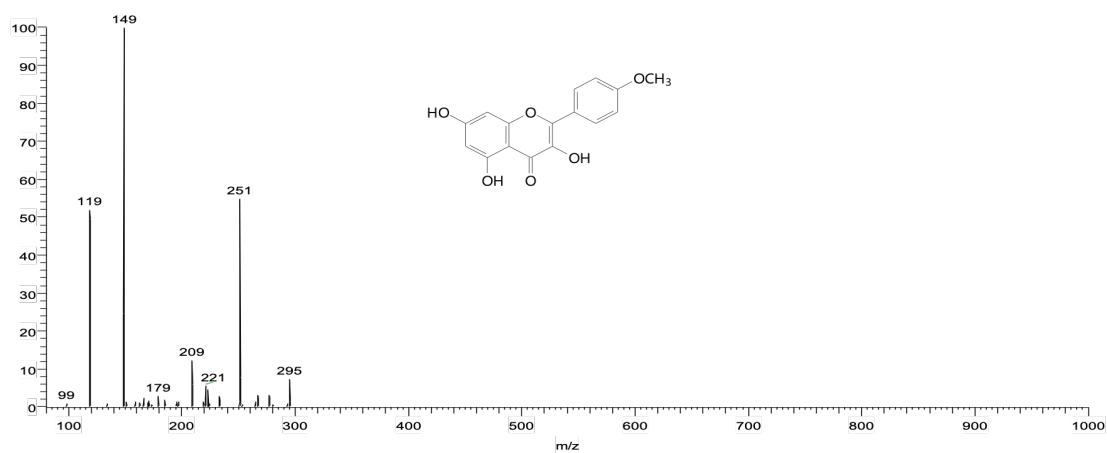

**Figure S21.** Product ion mass spectrum (MS/MS) of the ion of  $m/z$  301 (ascribed as deprotonated Quercetin).

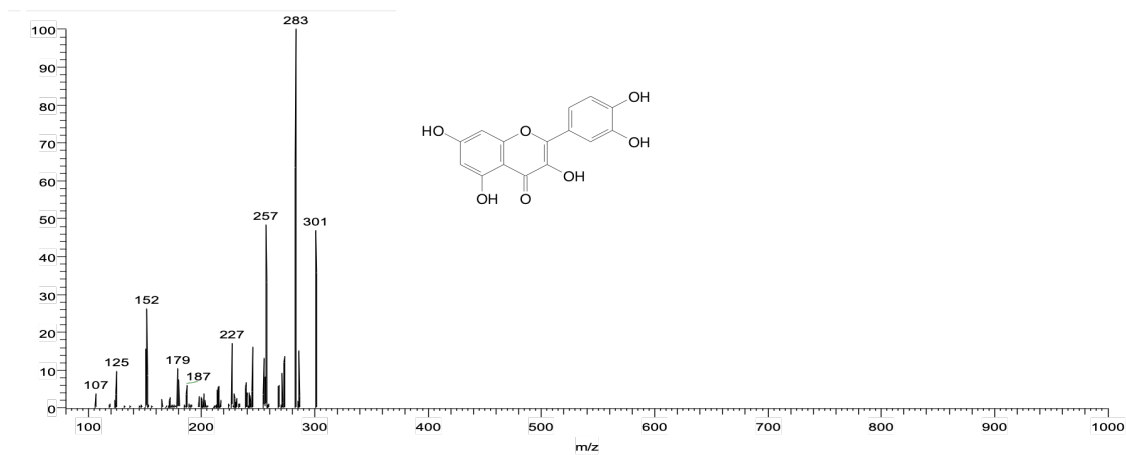

**Figure S22.** Product ion mass spectrum (MS/MS) of the ion of  $m/z$  303 (ascribed as deprotonated Taxifolin).

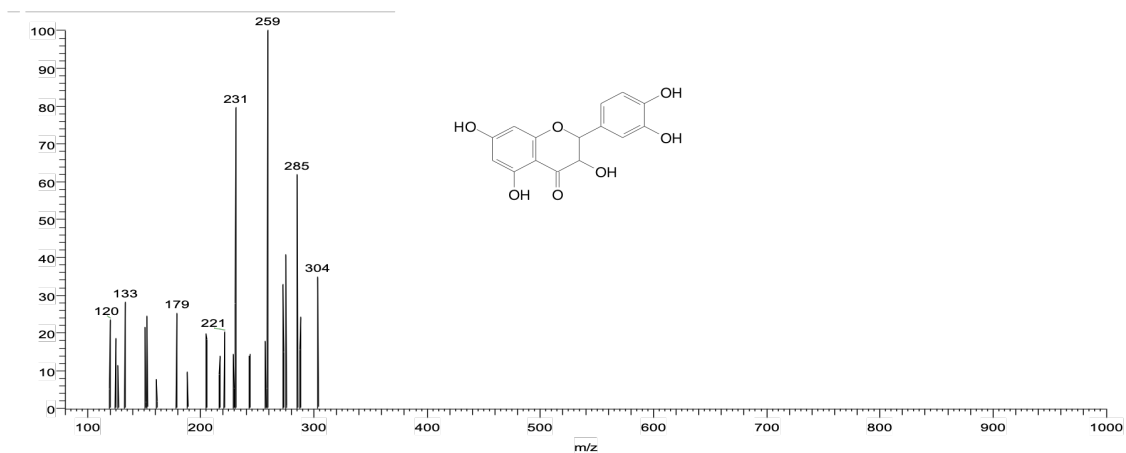

**Figure S23.** Product ion mass spectrum (MS/MS) of the ion of  $m/z$  311 (ascribed as deprotonated Pinobanksin-3-acetate).

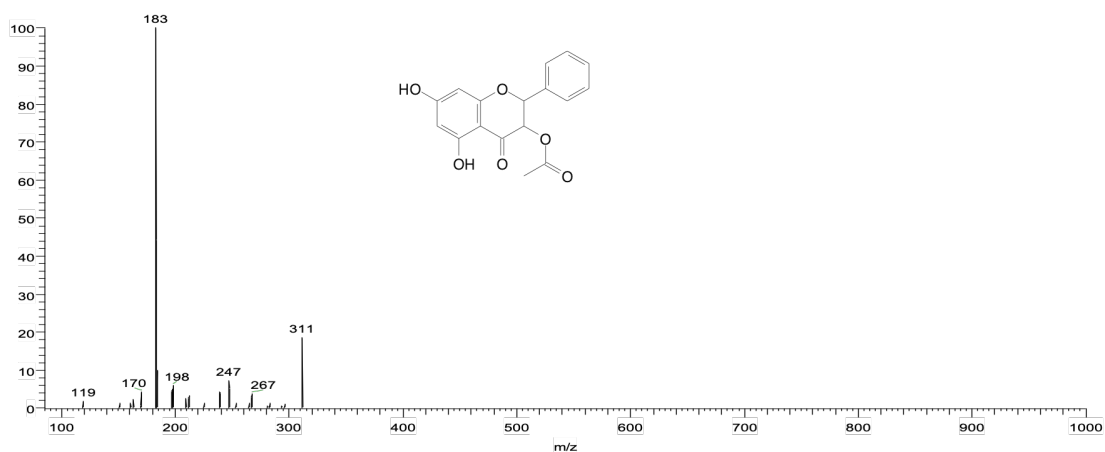

**Figure S24.** Product ion mass spectrum (MS/MS) of the ion of  $m/z$  313 (ascribed as deprotonated Quercetin 3-methyl ether).

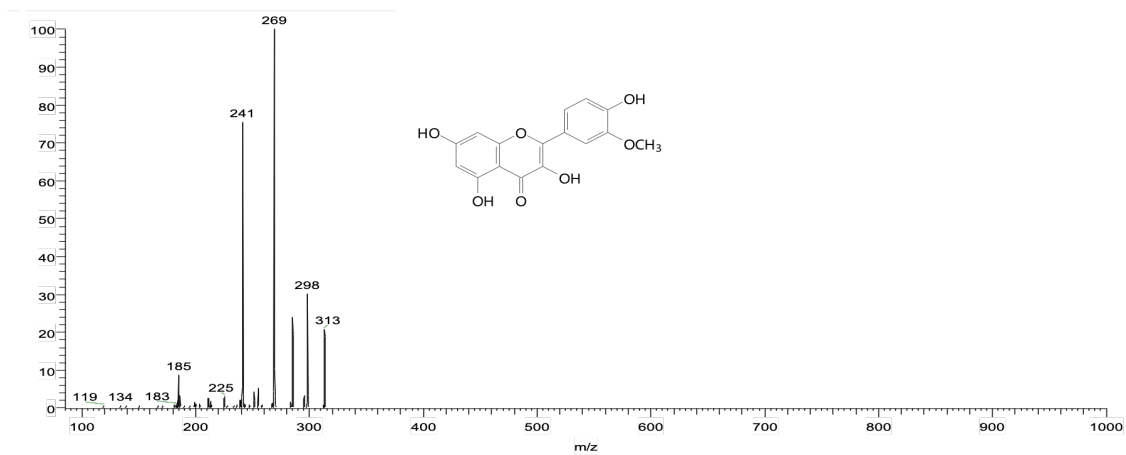



**Figure S25.** Product ion mass spectrum (MS/MS) of the ion of  $m/z$  319 (ascribed as deprotonated Cupressic acid).

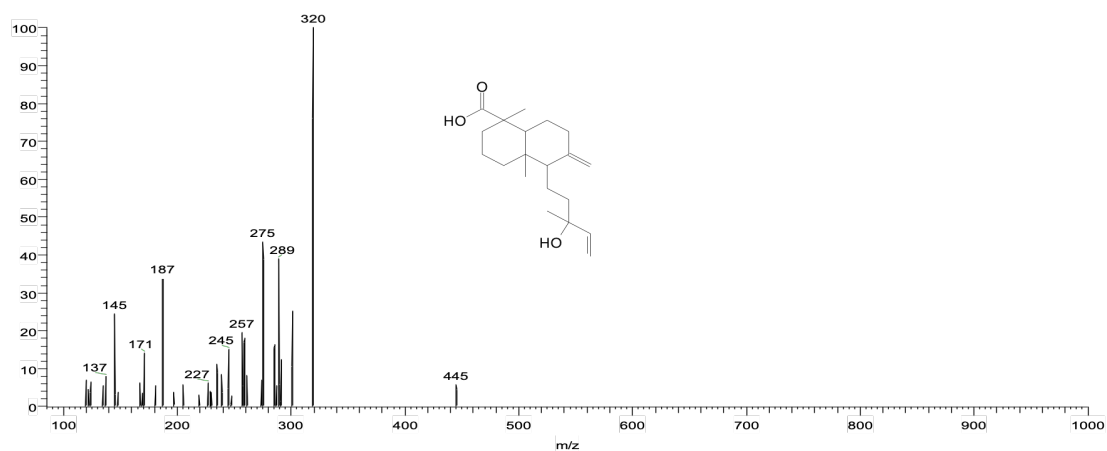

**Figure S26.** Product ion mass spectrum (MS/MS) of the ion of  $m/z$  333 (ascribed as deprotonated Agathic acid).

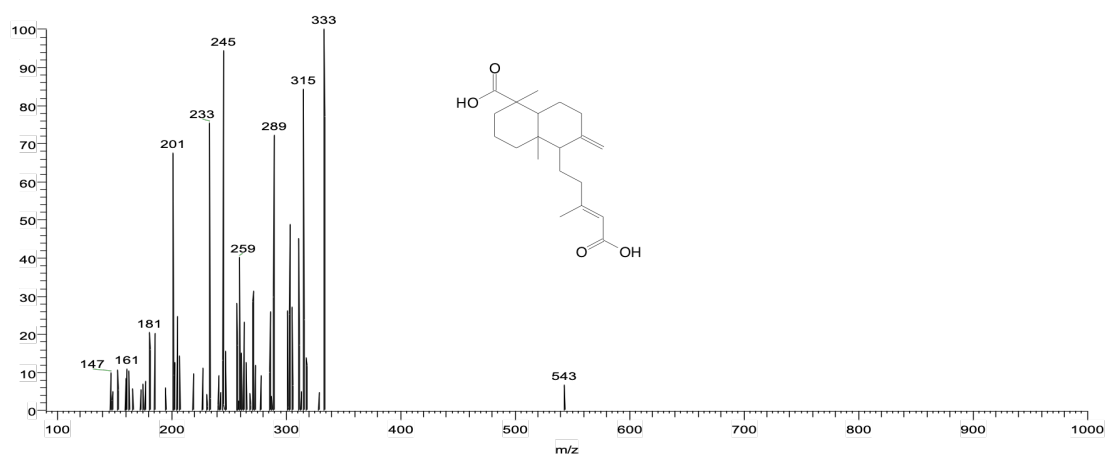

**Figure S27.** Product ion mass spectrum (MS/MS) of the ion of  $m/z$  353 (ascribed as deprotonated Chlorogenic acid).

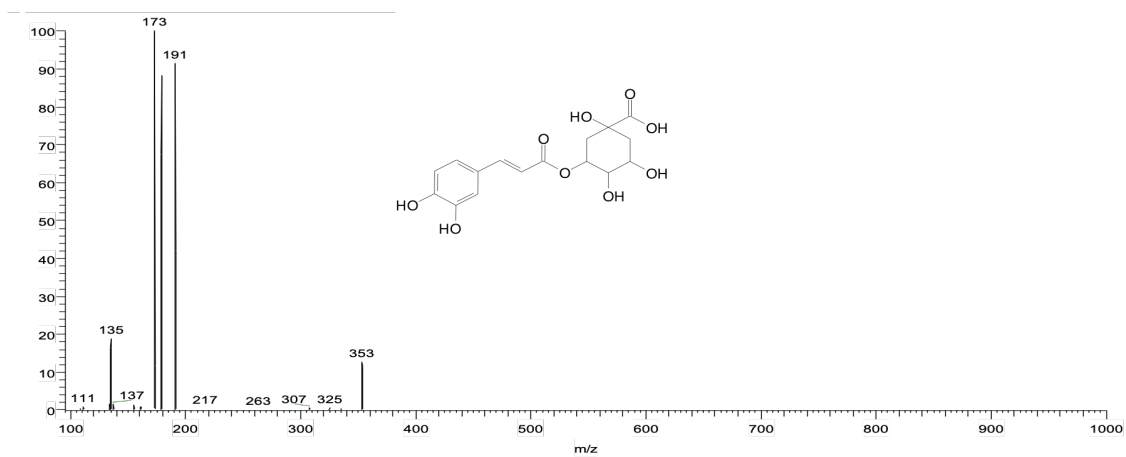

**Figure S28.** Product ion mass spectrum (MS/MS) of the ion of  $m/z$  357 (ascribed as deprotonated Matairesinol).

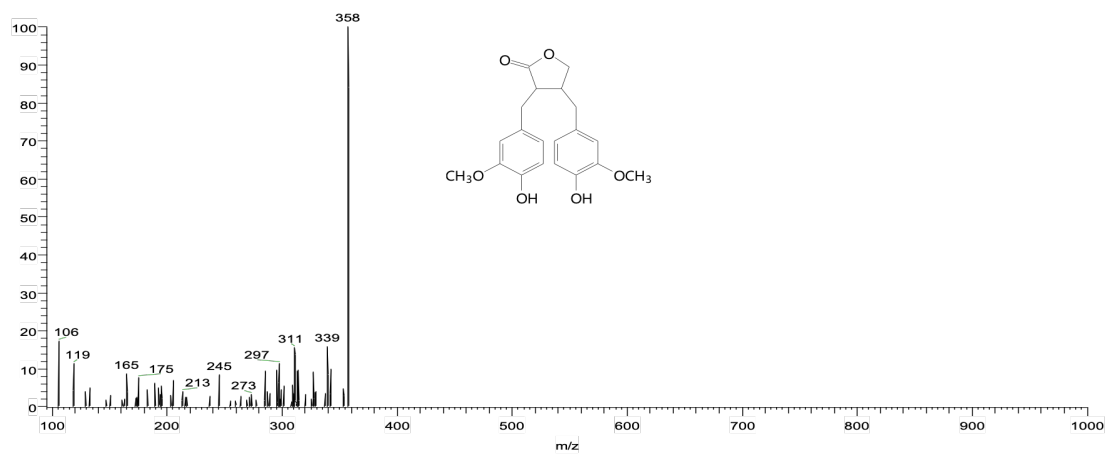

**Figure S29.** Product ion mass spectrum (MS/MS) of the ion of  $m/z$  515 (ascribed as deprotonated Dicafeoylquinic acid).

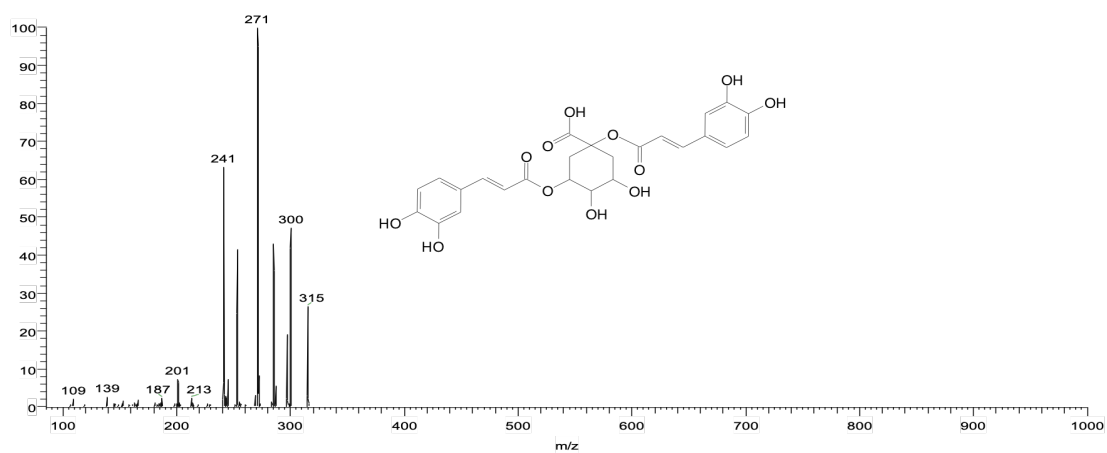

Supplement: s1 [file s1]
